# Supplementary figures and images for: Strain-rate stiffening of cortical bone: observations and implications from nanoindentation experiments
Source: Royal Society of Chemistry journal article supplement (doi:10.1039/c4nr03180f), 2014-01-01

Supplemental Figure 3

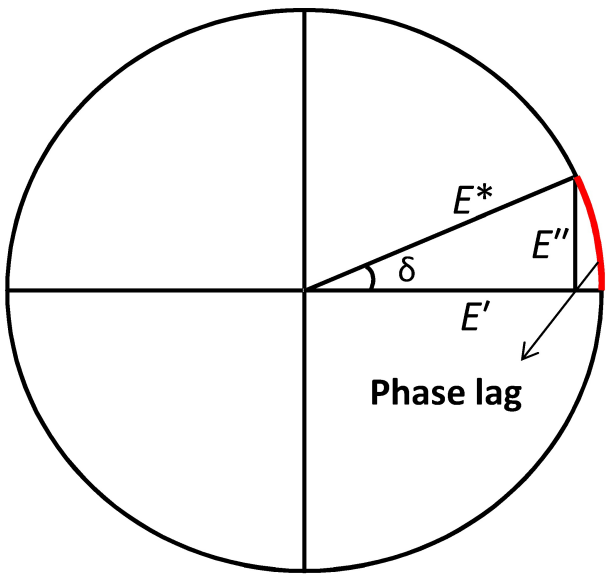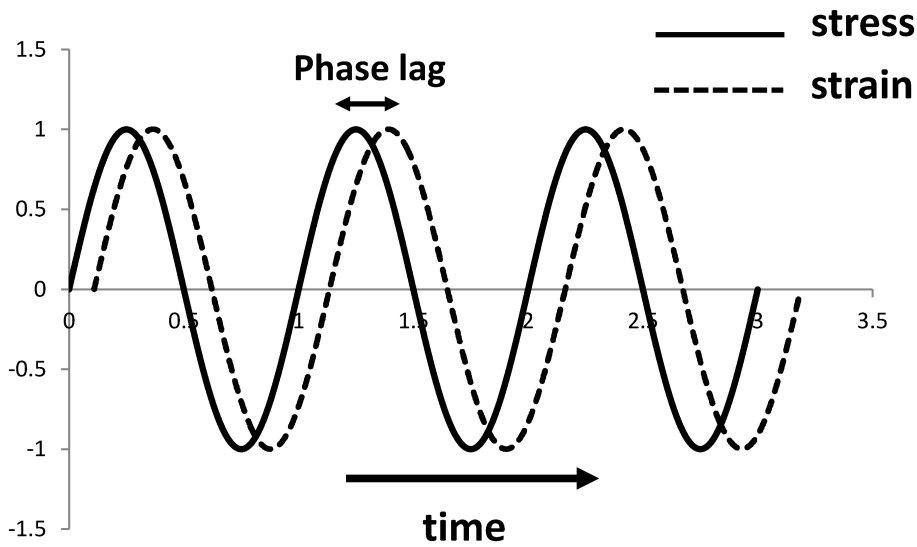

Supplement: c4nr03180f4.pdf [file c4nr03180f4.pdf]

## Supplemental Figure 4

**A**

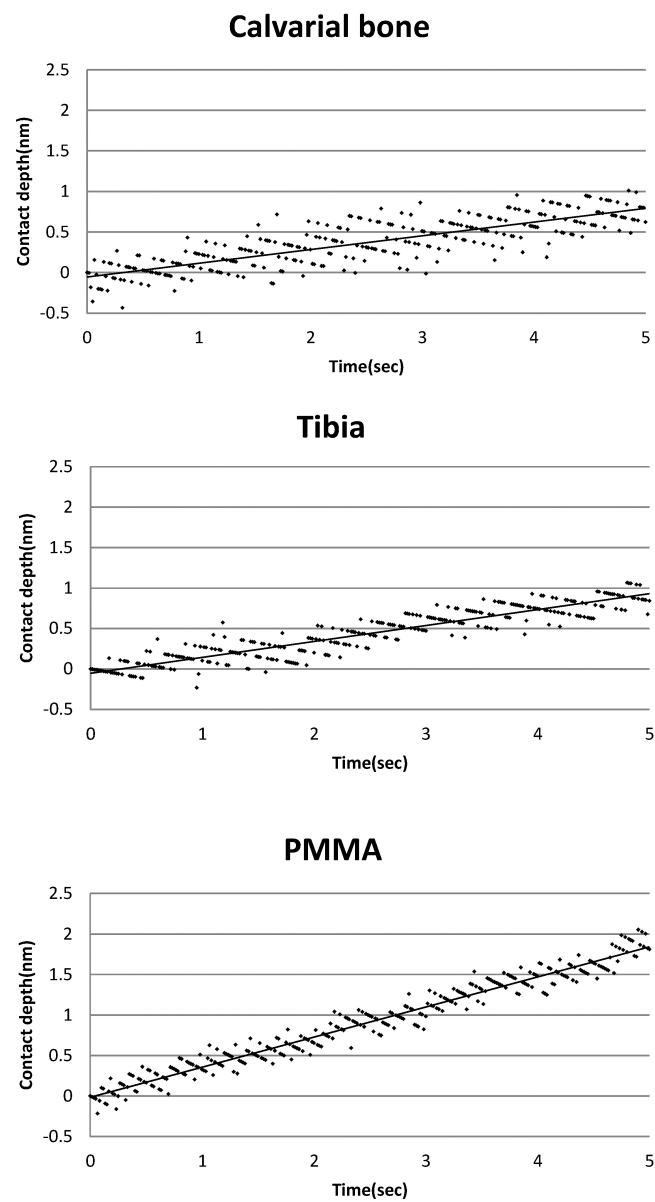

**B**

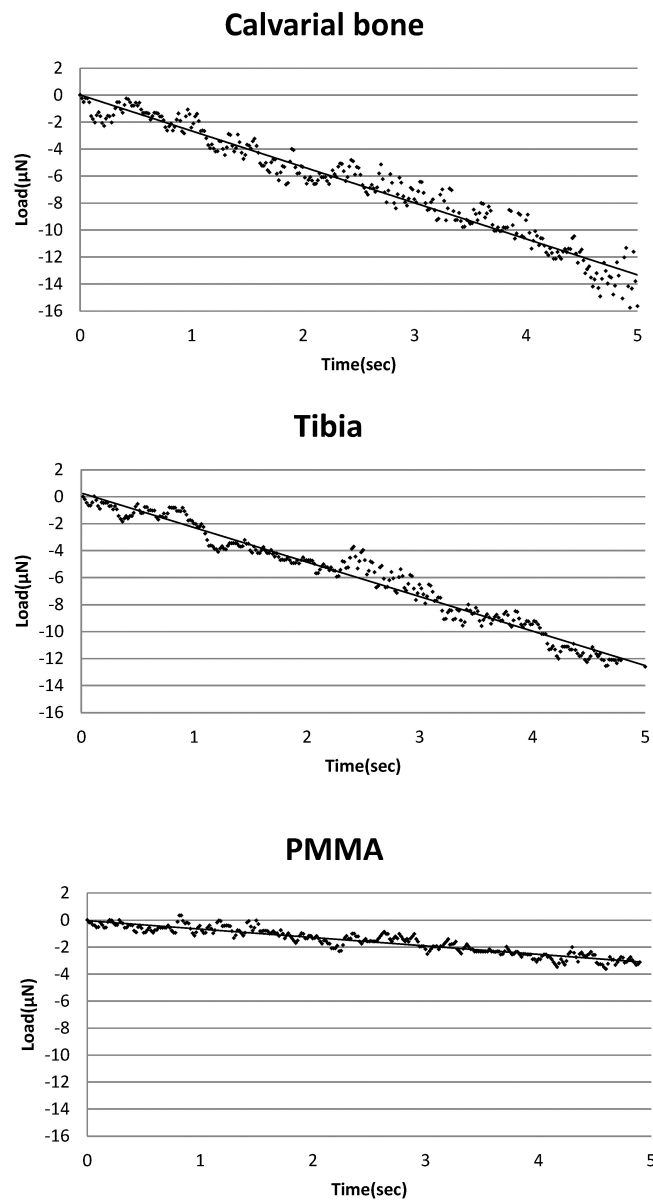

Supplement: c4nr03180f5.pdf [file c4nr03180f5.pdf]
